# Supplementary material
Source: PubMed Central journal article supplement (PMC7675218)
Supplement: jamacardiol-e205573-s001.pdf [file jamacardiol-e205573-s001.pdf]

## Supplemental Online Content

Brunner G, Virani SS, Sun W, et al. Associations between carotid artery plaque burden, plaque characteristics, and cardiovascular events: the ARIC Carotid Magnetic Resonance Imaging study. *JAMA Cardiol*. Published online November 18, 2020.

doi:10.1001/jamacardio.2020.5573

**eTable 1.** Continuous carotid artery MRI plaque characteristics for incident CVD analyses

**eTable 2.** Univariable and multivariable Cox proportional hazards models for incident CVD events for continuous carotid artery MRI plaque characteristics

**eTable 3.** Univariable and multivariable Cox proportional hazard ratios for incident coronary heart disease events for carotid MRI plaque burden variables and categorical plaque characteristics

**eTable 4.** Univariable and multivariable Cox proportional hazard ratios for incident coronary heart disease events for continuous carotid artery MRI plaque characteristics

**eTable 5.** Univariable and multivariable Cox proportional hazard ratios for incident ischemic stroke events for carotid MRI plaque burden variables and categorical plaque characteristics

**eTable 6.** Univariable and multivariable Cox proportional hazard ratios for incident ischemic stroke events for continuous carotid artery MRI plaque characteristics

**eTable 7.** Receiver operating characteristics (ROC) analyses and area under curve (AUC) values for discriminating incident CVD events using MRI plaque burden variables and characteristics, and traditional CVD risk factors

**eTable 8.** Comparison of 10-year risk prediction for incident CVD events using traditional CVD risk factors alone (basic model) and CVD risk factors plus MRI plaque characteristics and plaque burden variables (extended model)

**eTable 9.** Details on the conversion between original values and ln-transformed values for continuous carotid MRI plaque burden variables and plaque characteristics for the ARIC incident CVD population

This supplemental material has been provided by the authors to give readers additional information about their work.

**eTable 1.** Continuous carotid artery MRI plaque characteristics for incident CVD analyses

| Variable                                                                                                                                                                                                                                                                                                     | Incident CVD events (n=76) | No Incident CVD events (n=324) | P-value |
|--------------------------------------------------------------------------------------------------------------------------------------------------------------------------------------------------------------------------------------------------------------------------------------------------------------|----------------------------|--------------------------------|---------|
| <b>MRI Carotid Artery Plaque Characteristics</b>                                                                                                                                                                                                                                                             |                            |                                |         |
| Total lipid core volume, mL                                                                                                                                                                                                                                                                                  | 0.05 (0.02, 0.11)          | 0.03 (0.01, 0.07)              | 0.03    |
| Maximum lipid core area, mm <sup>2</sup>                                                                                                                                                                                                                                                                     | 0.11 (0.05, 0.18)          | 0.07 (0.04, 0.13)              | 0.03    |
| Mean lipid core area, mm <sup>2</sup>                                                                                                                                                                                                                                                                        | 0.07 (0.04, 0.13)          | 0.05 (0.03, 0.09)              | 0.04    |
| Total lipid core % of total wall volume, %                                                                                                                                                                                                                                                                   | 9.93 (3.89, 18.91)         | 6.70 (3.55, 12.77)             | 0.05    |
| Mean fibrous cap thickness, mm                                                                                                                                                                                                                                                                               | 0.67 (0.40, 0.88)          | 0.66 (0.44, 0.86)              | 0.95    |
| Mean fibrous cap thickness at max. lipid core, mm                                                                                                                                                                                                                                                            | 0.62 (0.37, 0.83)          | 0.66 (0.44, 0.86)              | 0.47    |
| Minimum fibrous cap thickness, mm                                                                                                                                                                                                                                                                            | 0.37 (0.19, 0.59)          | 0.43 (0.25, 0.66)              | 0.13    |
| Mean minimum fibrous cap thickness, mm                                                                                                                                                                                                                                                                       | 0.44 (0.25, 0.62)          | 0.45 (0.27, 0.66)              | 0.47    |
| Values are reported as median (25 <sup>th</sup> , 75 <sup>th</sup> percentiles). Continuous variables were analyzed with a two-sample Wilcoxon rank-sum test for non-normal variables. Analyses of continuous carotid artery MRI plaque characteristics are limited to those participants with a lipid core. |                            |                                |         |

**eTable 2.** Univariable and multivariable Cox proportional hazards models for incident CVD events for continuous carotid artery MRI plaque characteristics

| Variable (per 1-unit increment in ln-transformed continuous variables*)                                                                                                                                                                                                                                                                                                                                                                                                                                                                                                                                                                                                                                                                                                                                                                                                                                                                                                                                                                                                                     | Univariable HR    |         | Adj. for clinical factors: HR |         | Adj. for carotid thickness: HR |         |
|---------------------------------------------------------------------------------------------------------------------------------------------------------------------------------------------------------------------------------------------------------------------------------------------------------------------------------------------------------------------------------------------------------------------------------------------------------------------------------------------------------------------------------------------------------------------------------------------------------------------------------------------------------------------------------------------------------------------------------------------------------------------------------------------------------------------------------------------------------------------------------------------------------------------------------------------------------------------------------------------------------------------------------------------------------------------------------------------|-------------------|---------|-------------------------------|---------|--------------------------------|---------|
|                                                                                                                                                                                                                                                                                                                                                                                                                                                                                                                                                                                                                                                                                                                                                                                                                                                                                                                                                                                                                                                                                             | HR (95% CI)       | P-value | HR (95% CI)                   | P-value | HR (95% CI)                    | P-value |
| <b>Continuous Carotid Plaque Characteristics*</b>                                                                                                                                                                                                                                                                                                                                                                                                                                                                                                                                                                                                                                                                                                                                                                                                                                                                                                                                                                                                                                           |                   |         |                               |         |                                |         |
| Total lipid core volume                                                                                                                                                                                                                                                                                                                                                                                                                                                                                                                                                                                                                                                                                                                                                                                                                                                                                                                                                                                                                                                                     | 1.22 (0.92, 1.60) | 0.17    | 0.95 (0.67, 1.34)             | 0.78    | 1.22 (0.84, 1.78)              | 0.29    |
| Mean lipid core area                                                                                                                                                                                                                                                                                                                                                                                                                                                                                                                                                                                                                                                                                                                                                                                                                                                                                                                                                                                                                                                                        | 1.28 (0.89, 1.84) | 0.19    | 0.92 (0.58, 1.48)             | 0.73    | 1.25 (0.73, 2.14)              | 0.43    |
| Max. lipid core area                                                                                                                                                                                                                                                                                                                                                                                                                                                                                                                                                                                                                                                                                                                                                                                                                                                                                                                                                                                                                                                                        | 1.27 (0.88, 1.83) | 0.20    | 0.92 (0.58, 1.44)             | 0.70    | 1.26 (0.76, 2.08)              | 0.38    |
| Total lipid core %-of total wall volume                                                                                                                                                                                                                                                                                                                                                                                                                                                                                                                                                                                                                                                                                                                                                                                                                                                                                                                                                                                                                                                     | 1.25 (0.87, 1.78) | 0.23    | 0.96 (0.64, 1.43)             | 0.84    | 1.21 (0.81, 1.81)              | 0.36    |
| Mean fibrous cap thickness                                                                                                                                                                                                                                                                                                                                                                                                                                                                                                                                                                                                                                                                                                                                                                                                                                                                                                                                                                                                                                                                  | 0.72 (0.40, 1.29) | 0.27    | 0.81 (0.47, 1.39)             | 0.44    | 0.86 (0.47, 1.57)              | 0.63    |
| Min. fibrous cap thickness                                                                                                                                                                                                                                                                                                                                                                                                                                                                                                                                                                                                                                                                                                                                                                                                                                                                                                                                                                                                                                                                  | 0.78 (0.53, 1.15) | 0.21    | 0.90 (0.60, 1.36)             | 0.63    | 0.91 (0.60, 1.39)              | 0.67    |
| <p><u>Adjusted for clinical factors:</u> age, sex, race, and ARIC study field center, smoking, body mass index, blood glucose, diabetic status, systolic blood pressure, diastolic blood pressure, HDL cholesterol, non-HDL cholesterol, use of blood pressure-lowering medication, cholesterol lowering medication use, aspirin use, diabetes medication use, and hs-CRP</p> <p><u>Adjusting for carotid thickness</u> (for analyses involving lipid rich core, calcification, and fibrous cap measures only): adjusted for clinical factors + maximum carotid artery wall thickness</p> <p>*Hazard ratios are per 1-unit increment in ln-transformed continuous plaque variables. All continuous carotid plaque characteristics were ln-transformed. eTable 9 shows details for the conversion between original values and ln-transformed values for continuous carotid MRI variables.<br/>           CI: confidence interval; HR: hazard ratio.<br/>           Analyses of continuous carotid artery MRI plaque characteristics are limited to those participants with a lipid core.</p> |                   |         |                               |         |                                |         |

**eTable 3.** Univariable and multivariable Cox proportional hazard ratios for incident coronary heart disease events for carotid MRI plaque burden variables and categorical plaque characteristics

| Variable (per 1-unit increment in ln-transformed continuous variables*, or dichotomous†) | Univariable HR    |         | Adj. for clinical factors: HR |         | Adj. for carotid thickness: HR |         |
|------------------------------------------------------------------------------------------|-------------------|---------|-------------------------------|---------|--------------------------------|---------|
|                                                                                          | HR (95% CI)       | P-value | HR (95% CI)                   | P-value | HR (95% CI)                    | P-value |
| <b>Carotid Plaque Burden*</b>                                                            |                   |         |                               |         |                                |         |
| Lumen area                                                                               | 0.67 (0.40, 1.13) | 0.13    | 0.59 (0.37, 0.94)             | 0.03    |                                |         |
| Wall area                                                                                | 1.84 (1.07, 3.16) | 0.03    | 1.15 (0.60, 2.19)             | 0.68    |                                |         |
| Total wall volume                                                                        | 1.89 (1.04, 3.45) | 0.04    | 1.17 (0.54, 2.55)             | 0.69    |                                |         |
| Maximum carotid artery wall thickness                                                    | 1.73 (1.04, 2.89) | 0.03    | 1.36 (0.77, 2.40)             | 0.29    |                                |         |
| Normalized wall index                                                                    | 2.20 (0.97, 5.01) | 0.06    | 1.89 (0.80, 4.47)             | 0.15    |                                |         |
| Max. stenosis                                                                            | 1.31 (1.13, 1.53) | <0.001  | 1.24 (1.04, 1.47)             | 0.02    |                                |         |
| <b>Carotid Plaque Characteristics†</b>                                                   |                   |         |                               |         |                                |         |
| Presence of lipid core                                                                   | 2.54 (1.61, 3.99) | <0.001  | 2.05 (1.21, 3.46)             | 0.007   | 2.43 (1.25, 4.72)              | 0.009   |
| Presence of lipid core in 2+ adjacent slices                                             | 2.50 (1.57, 3.99) | <0.001  | 1.92 (1.14, 3.25)             | 0.02    | 2.11 (1.15, 3.89)              | 0.02    |
| Presence of calcification                                                                | 2.15 (1.35, 3.41) | 0.001   | 1.70 (1.02, 2.83)             | 0.04    | 1.68 (0.79, 3.57)              | 0.18    |
| Presence of intra plaque hemorrhage                                                      | 1.48 (0.77, 2.85) | 0.24    | 1.16 (0.57, 2.34)             | 0.68    |                                |         |

Adjusted for clinical factors: age, sex, race, and ARIC study field center, smoking, body mass index, blood glucose, diabetic status, systolic blood pressure, diastolic blood pressure, HDL cholesterol, non-HDL cholesterol, use of blood pressure-lowering medication, cholesterol lowering medication use, aspirin use, diabetes medication use, and hs-CRP

Adjusting for carotid thickness (for analyses involving lipid rich core, calcification, and fibrous cap measures only): adjusted for clinical factors + maximum carotid artery wall thickness

\*Hazard ratios are per 1-unit increment in ln-transformed continuous plaque burden variables. All plaque burden variables were ln-transformed. eTable 9 shows details for the conversion between original values and ln-transformed values for continuous carotid MRI variables.

† Hazard ratio is for presence vs. absence.

CI: confidence interval; HR: hazard ratio.

**eTable 4** Univariable and multivariable Cox proportional hazard ratios for incident coronary heart disease events for continuous carotid artery MRI plaque characteristics

| Variable (per 1-unit increment in ln-transformed continuous variables*) | Univariable HR    |         | Adj. for clinical factors: HR |         | Adj. for carotid thickness: HR |         |
|-------------------------------------------------------------------------|-------------------|---------|-------------------------------|---------|--------------------------------|---------|
|                                                                         | HR (95% CI)       | P-value | HR (95% CI)                   | P-value | HR (95% CI)                    | P-value |
| <b>Carotid Plaque Characteristics*</b>                                  |                   |         |                               |         |                                |         |
| Total lipid core volume                                                 | 1.29 (0.92, 1.79) | 0.14    | 1.03 (0.70, 1.53)             | 0.88    | 1.24 (0.80, 1.93)              | 0.33    |
| Mean lipid core area                                                    | 1.35 (0.88, 2.06) | 0.17    | 0.98 (0.57, 1.70)             | 0.94    | 1.15 (0.61, 2.19)              | 0.67    |
| Max. lipid core area                                                    | 1.38 (0.90, 2.11) | 0.14    | 1.01 (0.60, 1.71)             | 0.98    | 1.27 (0.68, 2.37)              | 0.45    |
| Total lipid core %-of total wall volume                                 | 1.37 (0.87, 2.14) | 0.17    | 1.08 (0.67, 1.74)             | 0.74    | 1.32 (0.81, 2.15)              | 0.27    |
| Mean fibrous cap thickness                                              | 0.64 (0.33, 1.26) | 0.20    | 0.69 (0.39, 1.22)             | 0.20    | 0.70 (0.38, 1.28)              | 0.25    |
| Min. fibrous cap thickness                                              | 0.69 (0.45, 1.08) | 0.10    | 0.80 (0.52, 1.23)             | 0.30    | 0.80 (0.52, 1.23)              | 0.31    |

Adjusted for clinical factors: age, sex, race, and ARIC study field center, smoking, body mass index, blood glucose, diabetic status, systolic blood pressure, diastolic blood pressure, HDL cholesterol, non-HDL cholesterol, use of blood pressure-lowering medication, cholesterol lowering medication use, aspirin use, diabetes medication use, and hs-CRP

Adjusting for carotid thickness (for analyses involving lipid rich core, calcification, and fibrous cap measures only): adjusted for clinical factors + maximum carotid artery wall thickness

\*Hazard ratios are per 1-unit increment in ln-transformed continuous plaque variables. All continuous carotid plaque characteristics were ln-transformed. eTable 9 shows details for the conversion between original values and ln-transformed values for continuous carotid MRI variables. CI: confidence interval; HR: hazard ratio.

Analyses of continuous carotid artery MRI plaque characteristics are limited to those participants with a lipid core.

**eTable 5.** Univariable and multivariable Cox proportional hazard ratios for incident ischemic stroke events for carotid MRI plaque burden variables and categorical plaque characteristics

| Variable (per 1-unit increment in ln-transformed continuous variables*, or dichotomous†) | Univariable HR    |         | Adj. for clinical factors: HR |         | Adj. for carotid thickness: HR |         |
|------------------------------------------------------------------------------------------|-------------------|---------|-------------------------------|---------|--------------------------------|---------|
|                                                                                          | HR (95% CI)       | P-value | HR (95% CI)                   | P-value | HR (95% CI)                    | P-value |
| <b>Carotid Plaque Burden*</b>                                                            |                   |         |                               |         |                                |         |
| Lumen area                                                                               | 0.64 (0.35, 1.15) | 0.13    | 0.62 (0.36, 1.07)             | 0.09    |                                |         |
| Wall area                                                                                | 1.32 (0.58, 2.99) | 0.51    | 0.84 (0.32, 2.23)             | 0.73    |                                |         |
| Total wall volume                                                                        | 1.49 (0.62, 3.59) | 0.37    | 1.11 (0.39, 3.14)             | 0.85    |                                |         |
| Maximum carotid artery wall thickness                                                    | 1.00 (0.52, 1.94) | 0.99    | 0.79 (0.39, 1.60)             | 0.51    |                                |         |
| Normalized wall index                                                                    | 1.89 (0.58, 6.18) | 0.29    | 1.67 (0.55, 5.05)             | 0.37    |                                |         |
| Max. stenosis                                                                            | 1.36 (1.11, 1.67) | 0.003   | 1.29 (1.05, 1.58)             | 0.02    |                                |         |
| <b>Carotid Plaque Characteristics†</b>                                                   |                   |         |                               |         |                                |         |
| Presence of lipid core                                                                   | 2.17 (1.10, 4.28) | 0.03    | 1.84 (0.81, 4.15)             | 0.14    | 3.80 (1.13, 12.76)             | 0.03    |
| Presence of lipid core in 2+ adjacent slices                                             | 2.05 (1.02, 4.09) | 0.04    | 1.70 (0.77, 3.80)             | 0.19    | 3.14 (0.94, 10.43)             | 0.06    |
| Presence of calcification                                                                | 1.12 (0.54, 2.34) | 0.76    | 0.85 (0.36, 1.99)             | 0.71    | 0.98 (0.33, 2.92)              | 0.97    |
| Presence of intra plaque hemorrhage                                                      | 2.45 (1.07, 5.63) | 0.04    | 2.28 (0.87, 6.00)             | 0.10    |                                |         |

Adjusted for clinical factors: age, sex, race, and ARIC study field center, smoking, body mass index, blood glucose, diabetic status, systolic blood pressure, diastolic blood pressure, HDL cholesterol, non-HDL cholesterol, use of blood pressure-lowering medication, cholesterol lowering medication use, aspirin use, diabetes medication use, and hs-CRP

Adjusting for carotid thickness (for analyses involving lipid rich core, calcification, and fibrous cap measures only): adjusted for clinical factors + maximum carotid artery wall thickness

\*Hazard ratios are per 1-unit increment in ln-transformed continuous plaque burden variables. All plaque burden variables were ln-transformed. eTable 9 shows details for the conversion between original values and ln-transformed values for continuous carotid MRI variables.

† Hazard ratio is for presence vs. absence.

CI: confidence interval; HR: hazard ratio.



**eTable 6.** Univariable and multivariable Cox proportional hazard ratios for incident ischemic stroke events for continuous carotid artery MRI plaque characteristics

| Variable (per 1-unit increment in ln-transformed continuous variables*)                                                                                                                                                                                                                                                                                                                                                                                                                                                                                                                                                                                                                                                                                                                                                                                                                                                                                                                                                                                              | Univariable HR    |         | Adj. for clinical factors: HR |         | Adj. for carotid thickness: HR |         |
|----------------------------------------------------------------------------------------------------------------------------------------------------------------------------------------------------------------------------------------------------------------------------------------------------------------------------------------------------------------------------------------------------------------------------------------------------------------------------------------------------------------------------------------------------------------------------------------------------------------------------------------------------------------------------------------------------------------------------------------------------------------------------------------------------------------------------------------------------------------------------------------------------------------------------------------------------------------------------------------------------------------------------------------------------------------------|-------------------|---------|-------------------------------|---------|--------------------------------|---------|
|                                                                                                                                                                                                                                                                                                                                                                                                                                                                                                                                                                                                                                                                                                                                                                                                                                                                                                                                                                                                                                                                      | HR (95% CI)       | P-value | HR (95% CI)                   | P-value | HR (95% CI)                    | P-value |
| <b>Carotid Plaque Characteristics*</b>                                                                                                                                                                                                                                                                                                                                                                                                                                                                                                                                                                                                                                                                                                                                                                                                                                                                                                                                                                                                                               |                   |         |                               |         |                                |         |
| Total lipid core volume                                                                                                                                                                                                                                                                                                                                                                                                                                                                                                                                                                                                                                                                                                                                                                                                                                                                                                                                                                                                                                              | 0.92 (0.65, 1.32) | 0.66    | 0.69 (0.41, 1.15)             | 0.15    | 1.10 (0.62, 1.93)              | 0.75    |
| Mean lipid core area                                                                                                                                                                                                                                                                                                                                                                                                                                                                                                                                                                                                                                                                                                                                                                                                                                                                                                                                                                                                                                                 | 1.06 (0.66, 1.71) | 0.80    | 0.82 (0.38, 1.77)             | 0.61    | 1.84 (0.80, 4.23)              | 0.15    |
| Max. lipid core area                                                                                                                                                                                                                                                                                                                                                                                                                                                                                                                                                                                                                                                                                                                                                                                                                                                                                                                                                                                                                                                 | 0.93 (0.58, 1.49) | 0.77    | 0.67 (0.33-1.34)              | 0.25    | 1.30 (0.62, 2.72)              | 0.49    |
| Total lipid core %-of total wall volume                                                                                                                                                                                                                                                                                                                                                                                                                                                                                                                                                                                                                                                                                                                                                                                                                                                                                                                                                                                                                              | 0.89 (0.62, 1.28) | 0.53    | 0.65 (0.38, 1.11)             | 0.11    | 0.96 (0.56, 1.65)              | 0.88    |
| Mean fibrous cap thickness                                                                                                                                                                                                                                                                                                                                                                                                                                                                                                                                                                                                                                                                                                                                                                                                                                                                                                                                                                                                                                           | 1.00 (0.46, 2.20) | 0.99    | 1.23 (0.60, 2.54)             | 0.57    | 1.92 (0.84, 4.39)              | 0.12    |
| Min. fibrous cap thickness                                                                                                                                                                                                                                                                                                                                                                                                                                                                                                                                                                                                                                                                                                                                                                                                                                                                                                                                                                                                                                           | 1.04 (0.58, 1.87) | 0.89    | 1.18 (0.62, 2.24)             | 0.61    | 1.43 (0.71, 2.87)              | 0.32    |
| <p><u>Adjusted for clinical factors:</u> age, sex, race, and ARIC study field center, smoking, body mass index, blood glucose, diabetic status, systolic blood pressure, diastolic blood pressure, HDL cholesterol, non-HDL cholesterol, use of blood pressure-lowering medication, cholesterol lowering medication use, aspirin use, diabetes medication use, and hs-CRP</p> <p><u>Adjusting for carotid thickness</u> (for analyses involving lipid rich core, calcification, and fibrous cap measures only): adjusted for clinical factors + maximum carotid artery wall thickness</p> <p>*Hazard ratios are per 1-unit increment in ln-transformed continuous plaque variables. All continuous carotid plaque characteristics were ln-transformed. eTable 9 shows details for the conversion between original values and ln-transformed values for continuous carotid MRI variables.</p> <p>CI: confidence interval; HR: hazard ratio. Analyses of continuous carotid artery MRI plaque characteristics are limited to those participants with a lipid core.</p> |                   |         |                               |         |                                |         |



**eTable 7.** Receiver operating characteristics (ROC) analyses and area under curve (AUC) values for discriminating incident CVD events using MRI plaque burden variables and characteristics, and traditional CVD risk factors

| Model                                                                                                                                                                                                                                                                                                                                                                                                                                                                                                                                                                                                                                                                                                                                                                                                  | C-Statistic (95% CI)                    |                                 | P-value for model comparisons <sup>†</sup> |
|--------------------------------------------------------------------------------------------------------------------------------------------------------------------------------------------------------------------------------------------------------------------------------------------------------------------------------------------------------------------------------------------------------------------------------------------------------------------------------------------------------------------------------------------------------------------------------------------------------------------------------------------------------------------------------------------------------------------------------------------------------------------------------------------------------|-----------------------------------------|---------------------------------|--------------------------------------------|
| <b>Models of MRI Carotid Artery Plaque Characteristics</b>                                                                                                                                                                                                                                                                                                                                                                                                                                                                                                                                                                                                                                                                                                                                             |                                         |                                 |                                            |
| <b>Model 1:</b> Total wall volume, NWI, maximum wall thickness (n=1256)                                                                                                                                                                                                                                                                                                                                                                                                                                                                                                                                                                                                                                                                                                                                | 0.578 (0.531, 0.626)                    |                                 | -                                          |
| <b>Model 2:</b> Total lipid core volume, minimum fibrous cap thickness, calcification present (n=400)                                                                                                                                                                                                                                                                                                                                                                                                                                                                                                                                                                                                                                                                                                  | 0.590 (0.519, 0.661)                    |                                 | -                                          |
| <b>Model 3:</b> Total wall volume, NWI, maximum wall thickness, total lipid core volume, minimum fibrous cap thickness, calcification present (Model 1 + Model 2) (n=400)                                                                                                                                                                                                                                                                                                                                                                                                                                                                                                                                                                                                                              | 0.643 (0.577, 0.710)                    |                                 | -                                          |
| <b>Models with Traditional CVD Risk Factors</b>                                                                                                                                                                                                                                                                                                                                                                                                                                                                                                                                                                                                                                                                                                                                                        |                                         |                                 |                                            |
| <b>Model 4:</b> Age, gender (n=1256)                                                                                                                                                                                                                                                                                                                                                                                                                                                                                                                                                                                                                                                                                                                                                                   | 0.622 (0.578, 0.666)                    |                                 | -                                          |
| <b>Model 5:</b> Age, gender, CVD risk factors <sup>‡</sup> (n=1256)                                                                                                                                                                                                                                                                                                                                                                                                                                                                                                                                                                                                                                                                                                                                    | 0.670 (0.629, 0.711)                    |                                 | -                                          |
| <b>Models of MRI Carotid Artery Plaque Characteristics with Traditional CVD Risk Factors</b>                                                                                                                                                                                                                                                                                                                                                                                                                                                                                                                                                                                                                                                                                                           |                                         |                                 |                                            |
|                                                                                                                                                                                                                                                                                                                                                                                                                                                                                                                                                                                                                                                                                                                                                                                                        | AUC (95% CI) for traditional CVD model* | AUC (95% CI) for combined model |                                            |
| <b>Model 6:</b> MRI measures of plaque burden with traditional risk factors (Model 1 + Model 5) (n=1256)                                                                                                                                                                                                                                                                                                                                                                                                                                                                                                                                                                                                                                                                                               | 0.670 (0.629, 0.711)                    | 0.685 (0.645, 0.726)            | 0.10                                       |
| <b>Model 7:</b> MRI measures of plaque characteristics with traditional risk factors (Model 2 + Model 5) (n=400)                                                                                                                                                                                                                                                                                                                                                                                                                                                                                                                                                                                                                                                                                       | 0.625 (0.556, 0.695)                    | 0.648 (0.581, 0.715)            | 0.19                                       |
| <b>Model 8:</b> MRI measures of plaque burden and plaque characteristics with traditional risk factors (Model 3 + Model 5) (n=400)                                                                                                                                                                                                                                                                                                                                                                                                                                                                                                                                                                                                                                                                     | 0.625 (0.556, 0.695)                    | 0.691 (0.630, 0.753)            | 0.02                                       |
| <p>Values are reported as c-statistic (area under curve [AUC]) from the ROC curve. CI: confidence interval; ROC: receiver operating characteristics. Model 1 includes only plaque burden variables and model 2 includes only plaque characteristics variables.</p> <p><sup>‡</sup> CVD risk factors: total cholesterol, HDL cholesterol, SBP, antihypertensive medication use, diabetes, and smoking (current or former)</p> <p><sup>†</sup> P-values for the difference in the AUC value compared with traditional CVD risk factors listed in model 5.</p> <p>*The AUC comparisons with traditional CVD risk factors are limited to those ARIC participants with presence of carotid plaque burden and or plaque characteristics variables (model 1, 4, 5, 6: n= 1256; model 2, 3, 7, 8: n= 400).</p> |                                         |                                 |                                            |

**eTable 8.** Comparison of 10-year risk prediction for incident CVD events using traditional CVD risk factors alone (basic model) and CVD risk factors plus MRI plaque characteristics and plaque burden variables (extended model)

|                                       | AUC basic model (95% CI) | AUC extended model (95% CI) | $\Delta$ AUC (95% CI)   | NRI (95% CI)          | Continuous NRI (95% CI) | IDI (95% CI)            |
|---------------------------------------|--------------------------|-----------------------------|-------------------------|-----------------------|-------------------------|-------------------------|
| Total wall volume (N=1256)            | 0.678 (0.654, 0.727)     | 0.680 (0.655, 0.729)        | 0.002 (-0.0001, 0.013)  | 0.011 (-0.040, 0.080) | 0.125 (-0.067, 0.289)   | 0.002 (-0.00004, 0.011) |
| NWI (N=1256)                          | 0.678 (0.654, 0.727)     | 0.684 (0.659, 0.732)        | 0.006 (0.00002, 0.024)  | 0.059 (-0.035, 0.135) | 0.161 (-0.009, 0.337)   | 0.005 (0.0001, 0.020)   |
| Maximum wall thickness (N=1256)       | 0.678 (0.654, 0.727)     | 0.680 (0.656, 0.729)        | 0.002 (-0.0001, 0.013)  | 0.016 (-0.045, 0.098) | 0.117 (-0.051, 0.255)   | 0.002 (-0.00002, 0.011) |
| Lipid core present (N=1256)           | 0.678 (0.654, 0.727)     | 0.688 (0.663, 0.736)        | 0.010 (0.001, 0.028)    | 0.102 (-0.037, 0.161) | 0.275 (0.121, 0.431)    | 0.008 (0.001, 0.024)    |
| Calcification present (N=1256)        | 0.678 (0.654, 0.727)     | 0.683 (0.658, 0.731)        | 0.005 (0.00002, 0.019)  | 0.053 (-0.053, 0.120) | 0.270 (-0.071, 0.429)   | 0.004 (0.00003, 0.016)  |
| Total lipid core volume (N=400)       | 0.646 (0.620, 0.744)     | 0.660 (0.634, 0.749)        | 0.014 (-0.00003, 0.047) | 0.107 (-0.061, 0.202) | 0.235 (-0.093, 0.483)   | 0.008 (-0.0001, 0.036)  |
| Minimum fibrous cap thickness (N=400) | 0.646 (0.620, 0.744)     | 0.660 (0.636, 0.750)        | 0.014 (0.00002, 0.040)  | 0.069 (-0.051, 0.178) | 0.144 (-0.059, 0.478)   | 0.009 (0.00004, 0.038)  |

NRI was calculated using cut-points for 10-year risk set at 7.5% and 15%. CVD risk factors: total cholesterol, high-density-lipoprotein (HDL) cholesterol, systolic blood pressure, antihypertensive medication use, diabetes, and smoking (current or former). Continuous MRI plaque characteristics were analyzed in natural log transformation form. Abbreviations: AUC, area under the receiver operating characteristic curve; CI, confidence interval; NRI, net reclassification improvement; IDI, integrated discrimination index; CVD, cardiovascular disease.

**eTable 9.** Details on the conversion between original values and ln-transformed values for continuous carotid MRI plaque burden variables and plaque characteristics for the ARIC incident CVD population.

| Variables                               | N    | Unit            | Range of the original scale | Range of natural log-transformation | Mean (SD) on natural log-transformation | Conversion of natural log-transformation to the original scale (not linear)                                                                                  |
|-----------------------------------------|------|-----------------|-----------------------------|-------------------------------------|-----------------------------------------|--------------------------------------------------------------------------------------------------------------------------------------------------------------|
| Total wall volume                       | 1256 | mL              | 0.139, 1.615                | -1.975, 0.480                       | -0.89±0.356                             | Exp(-2) = 0.14 mL, exp(-1) = 0.37 mL, exp(0) = 1 mL, exp(1) = 2.72 mL, exp(2) = 7.39 mL                                                                      |
| CA lumen area                           | 1256 | mm <sup>2</sup> | 0.027, 1.576                | -3.612, 0.455                       | -0.92±0.501                             | Exp(-2) = 0.14 mm <sup>2</sup> , exp(-1) = 0.37 mm <sup>2</sup> , exp(0) = 1 mm <sup>2</sup> , exp(1) = 2.72 mm <sup>2</sup> , exp(2) = 7.39 mm <sup>2</sup> |
| CA wall area                            | 1256 | mm <sup>2</sup> | 0.089, 1.484                | -2.419, 0.395                       | -1.09±0.411                             | Exp(-2) = 0.14 mm <sup>2</sup> , exp(-1) = 0.37 mm <sup>2</sup> , exp(0) = 1 mm <sup>2</sup> , exp(1) = 2.72 mm <sup>2</sup> , exp(2) = 7.39 mm <sup>2</sup> |
| Normalized wall index                   | 1256 | NA              | 0.148, 0.933                | -1.908, -0.070                      | -0.84±0.333                             | Exp(-2) = 0.14, exp(-1) = 0.37, exp(0) = 1, exp(1) = 2.72, exp(2) = 7.39                                                                                     |
| Maximum carotid artery wall thickness   | 1256 | mm              | 0.53, 10.02                 | -0.635, 2.305                       | 0.68±0.504                              | Exp(-2) = 0.14 mm, exp(-1) = 0.37 mm, exp(0) = 1 mm, exp(1) = 2.72 mm, exp(2) = 7.39 mm                                                                      |
| Maximum stenosis*                       | 1256 | NA              | 0, 100                      | 0, 4.615                            | 1.18±1.510                              | Exp(0) = 1, exp(1) = 2.72, exp(2) = 7.39, exp(3) = 20.09, exp(4) = 54.60                                                                                     |
| Total lipid core volume                 | 400  | mL              | 0.0014, 0.675               | -6.571, -0.393                      | -3.40±1.147                             | Exp(-2) = 0.14 mL, exp(-1) = 0.37 mL, exp(0) = 1 mL, exp(1) = 2.72 mL, exp(2) = 7.39 mL                                                                      |
| Maximum lipid core area                 | 400  | mm <sup>2</sup> | 0.007, 0.834                | -4.962, -0.182                      | -2.57±0.869                             | Exp(-2) = 0.14 mm <sup>2</sup> , exp(-1) = 0.37 mm <sup>2</sup> , exp(0) = 1 mm <sup>2</sup> , exp(1) = 2.72 mm <sup>2</sup> , exp(2) = 7.39 mm <sup>2</sup> |
| Mean lipid core area                    | 400  | mm <sup>2</sup> | 0.007, 0.482                | -4.962, -0.730                      | -2.89±0.809                             | Exp(-2) = 0.14 mm <sup>2</sup> , exp(-1) = 0.37 mm <sup>2</sup> , exp(0) = 1 mm <sup>2</sup> , exp(1) = 2.72 mm <sup>2</sup> , exp(2) = 7.39 mm <sup>2</sup> |
| Total lipid core % of total wall volume | 400  | %               | 0.276, 59.989               | -1.286, 4.094                       | 1.91±0.976                              | Exp(-2) = 0.14%, exp(-1) = 0.37%, exp(0) = 1%, exp(1) = 2.72%, exp(2) = 7.39%, exp(3) = 20.09%, exp(4) = 54.60%                                              |
| Mean fibrous cap thickness              | 400  | mm              | 0.07, 1.895                 | -2.659, 0.639                       | -0.52±0.540                             | Exp(-2) = 0.14 mm, exp(-1) = 0.37 mm, exp(0) = 1 mm, exp(1) = 2.72 mm, exp(2) = 7.39 mm                                                                      |
| Minimum fibrous cap thickness           | 400  | mm              | 0.02, 1.56                  | -3.912, 0.445                       | -0.97±0.680                             | Exp(-2) = 0.14 mm, exp(-1) = 0.37 mm, exp(0) = 1 mm, exp(1) = 2.72 mm, exp(2) = 7.39 mm                                                                      |

\*natural log-transformation = ln(1+ maximum stenosis). ln: natural log.
